# Supplementary material for: Immobilization or mobilization after IUI: an RCT
Source: Oxford University Press journal article supplement (doi:10.1093/humrep/dex302), 2017-09-14
Supplement: dex302suppl_figure1.pdf [file dex302suppl_figure1.pdf]

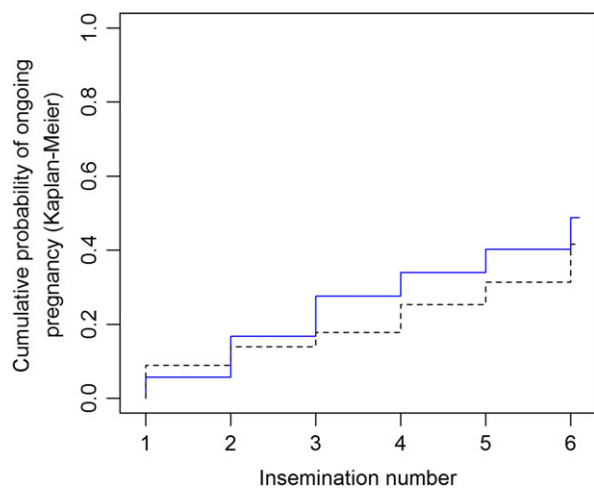

**Supplementary Figure S1** Kaplan-Meier curve expressing time to ongoing pregnancy. The blue continuous line represents the immediate mobilization group. The black dotted line represents the 15 min of supine immobilization group.
